# Supplementary material
Source: PubMed Central journal article supplement (PMC6878663)
Supplement: NIHMS1057411-supplement-Supp_Figures_and_Tables_1-3.pdf [file NIHMS1057411-supplement-Supp_Figures_and_Tables_1-3.pdf]

### A. Generation of duplicated floxed/flrtd HTR1A cassette

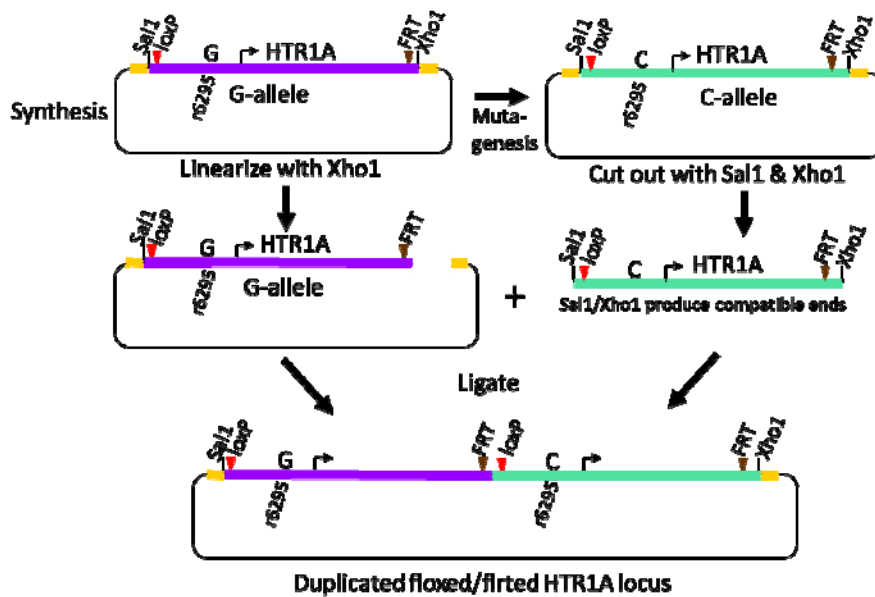

### B. Generation of duplicated floxed/flrtd HTR1A BAC

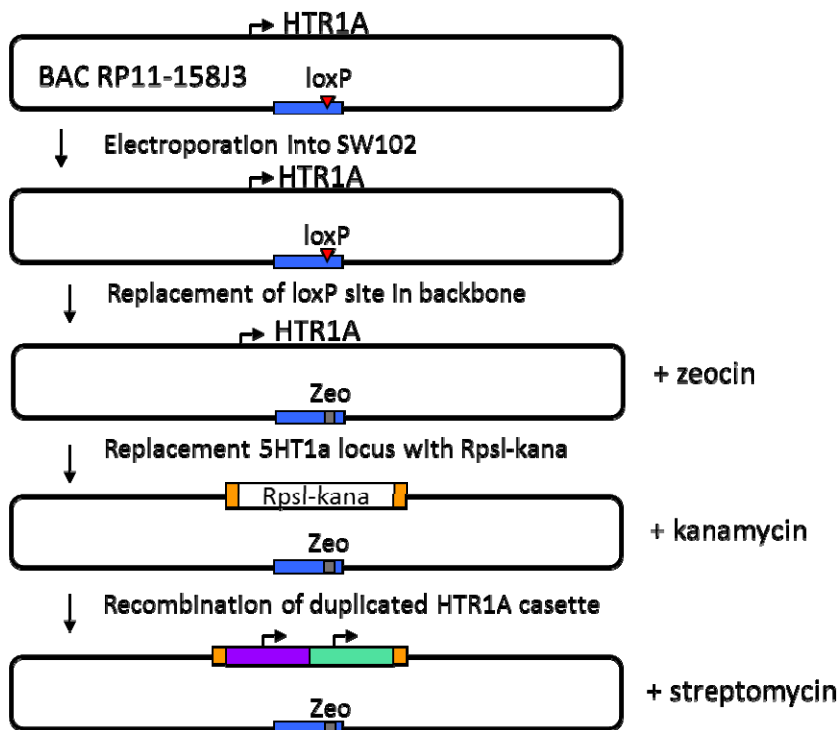

**Supplemental Figure 1. Generation of duplicated floxed/flrtd HTR1A BAC.** A) Cloning strategy to generate targeting plasmid with duplicated HTR1A gene containing rs6295G and C-allele. Yellow regions = homology arms for targeting recombination in BAC. B) Modification of BAC to delete loxP site from backbone and replace HTR1A gene with duplicated locus from A. Purple = G-allele. Green = C-allele. Yellow = homology arms for targeting. Not to scale.

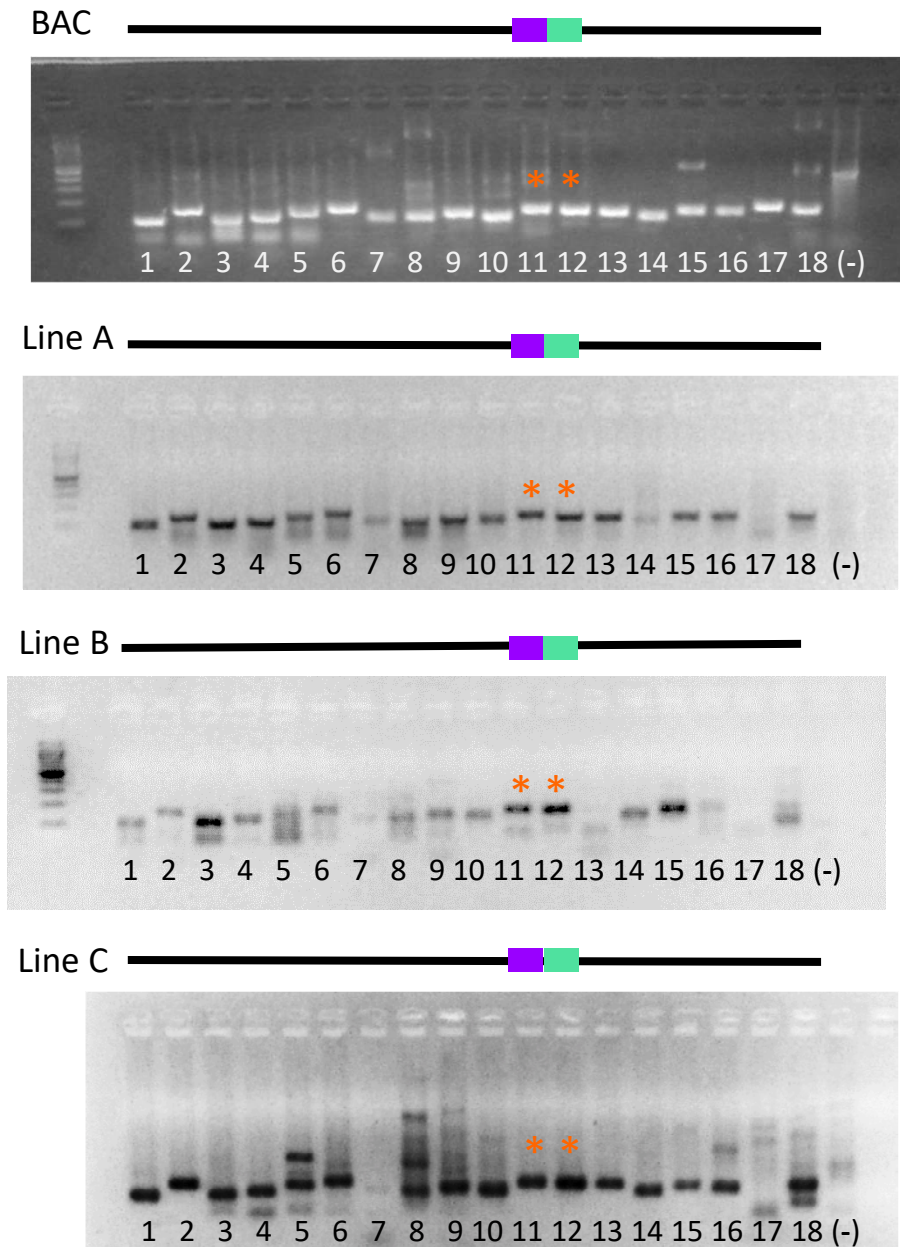

**Supplemental Figure 2. PCR tiling to assess integrated BAC integrity.** Each line was screened via PCR reactions designed to amplify small fragments every ~10kb across the BAC. Orange asterisks indicate amplicons that fell within the duplicated region containing rs6295 and hHTR1A, which is shown in purple (rs6295G) and green (rs6295C) in the diagram above. Red dashes indicate missing amplicons, suggesting a truncation of the 3' end of the BAC in Line B between primer pair 16 and 17. Primer locations are provided in supplementary table 2.

## 8-OH-DPAT-induced Hypothermia

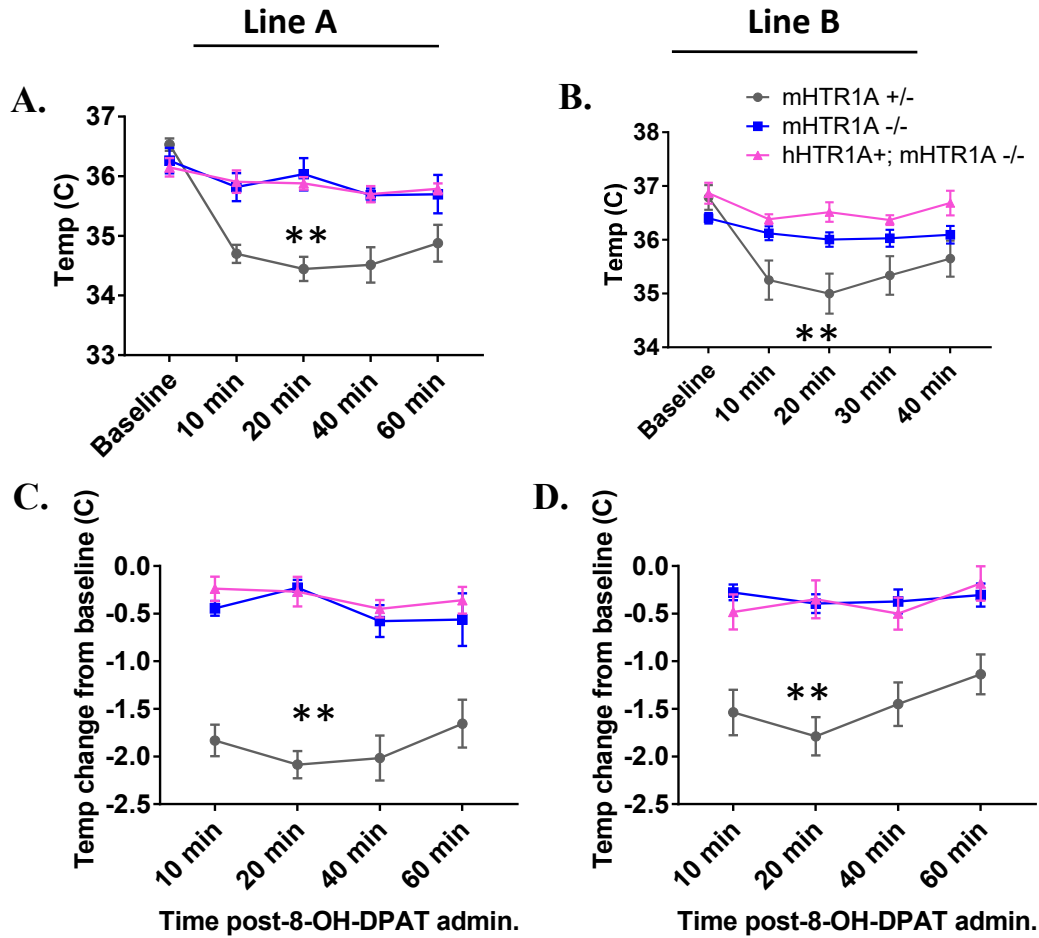

### Supplemental Figure 3. Lack of 8-OH-DPAT induced hypothermia in hHTR1A mice.

mHTR1A +/- mice exhibited normal hypothermic responses following administration of 8-OH-DPAT, which were not observed in mHTR1A -/- or hHTR1A; mHTR1A -/- mice, indicating a lack of functional 5-HT1A autoreceptor expression. In the Line, (A) Body temperature before and after administration of 8-OH DPAT, (B) change in temperature relative to baseline ( $p < 0.0001$ ). Similar results were found in line B. (C) Body temperature before and after administration of 8-OH DPAT, (D) change in temperature relative to baseline ( $p < 0.0001$ ). Values represent mean  $\pm$  SEM.

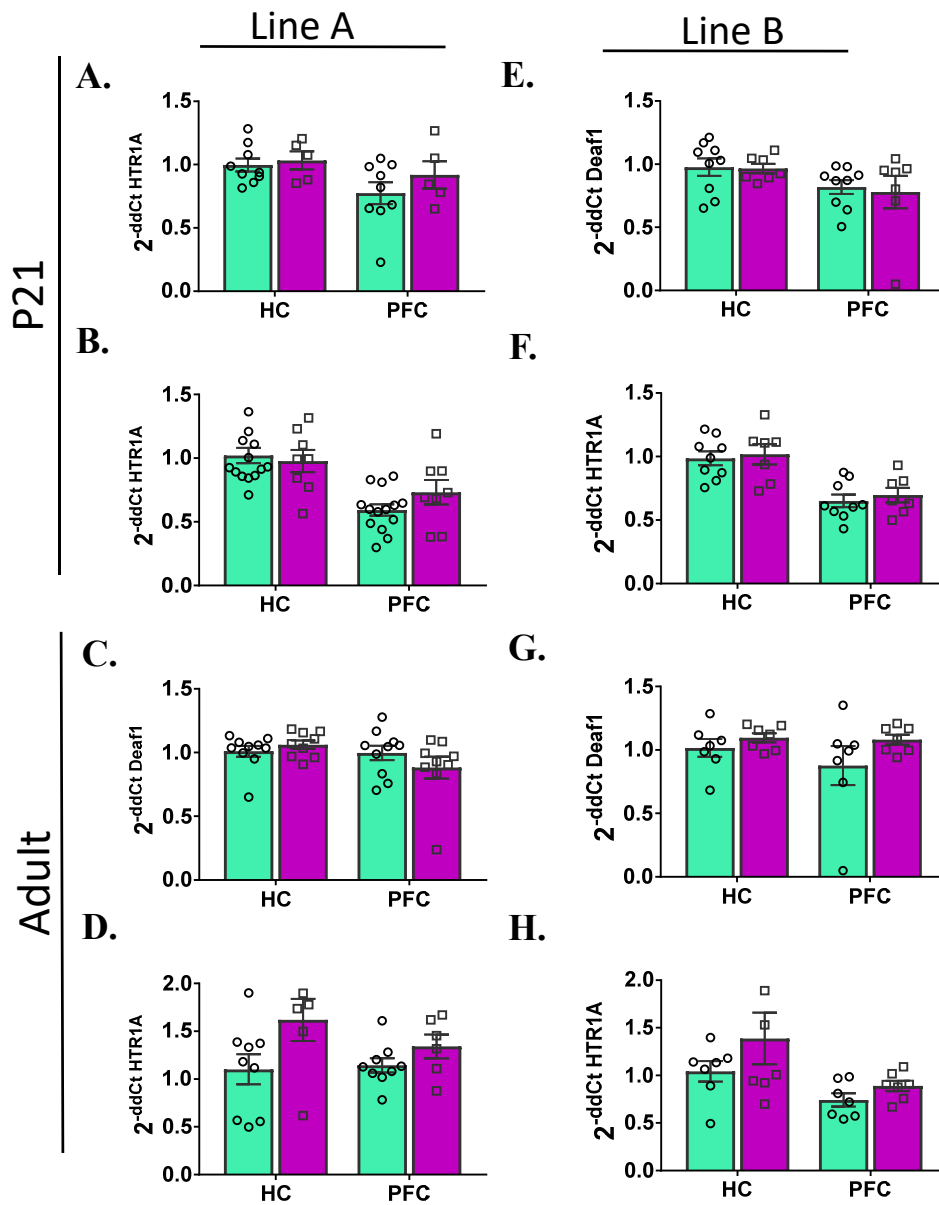

**Supplementary Figure 4. No genotype-dependent differences in mDeaf1 or hHTR1A mRNA expression.** qRT-PCR analysis of mouse *Deaf1* and human *HTR1A* expression in microdissected prefrontal cortex and hippocampus did not reveal differences in mDeaf1 or hHtr1A mRNA expression in either line examined. Group sizes and statistical analyses available in supplemental table 4. Bar graphs are mean  $\pm$  SEM.

## Zero maze

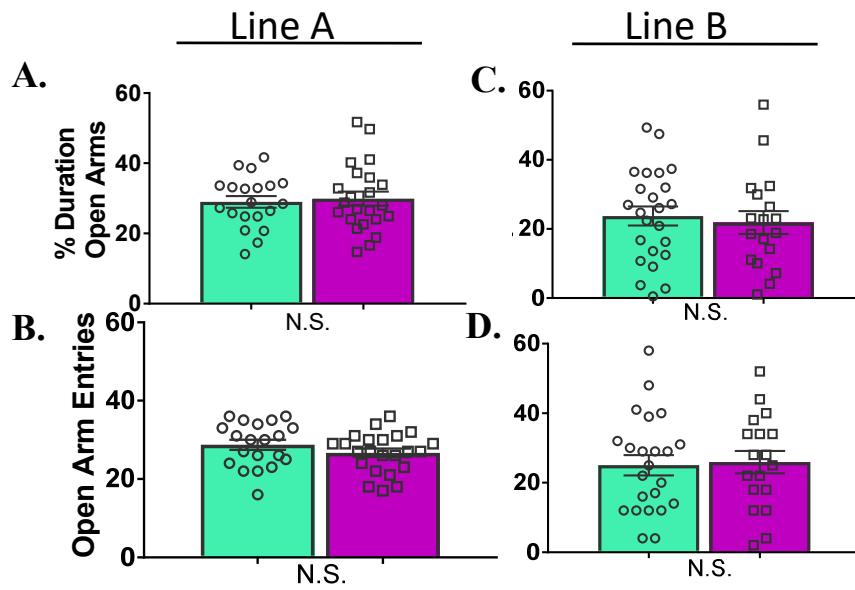

**Supplemental Figure 5. No differences between genotypes in zero maze performance.** In line A, there was no difference in (A) percent time spent in the open arms or (B) open arm entries (CC=20 GG=23;  $p=0.215$ ) between genotypes. In line B, there were no differences in (C) percent time in open arms or (D) open arm entries. Values represent mean  $\pm$ SEM.

## Novelty Suppressed Feeding

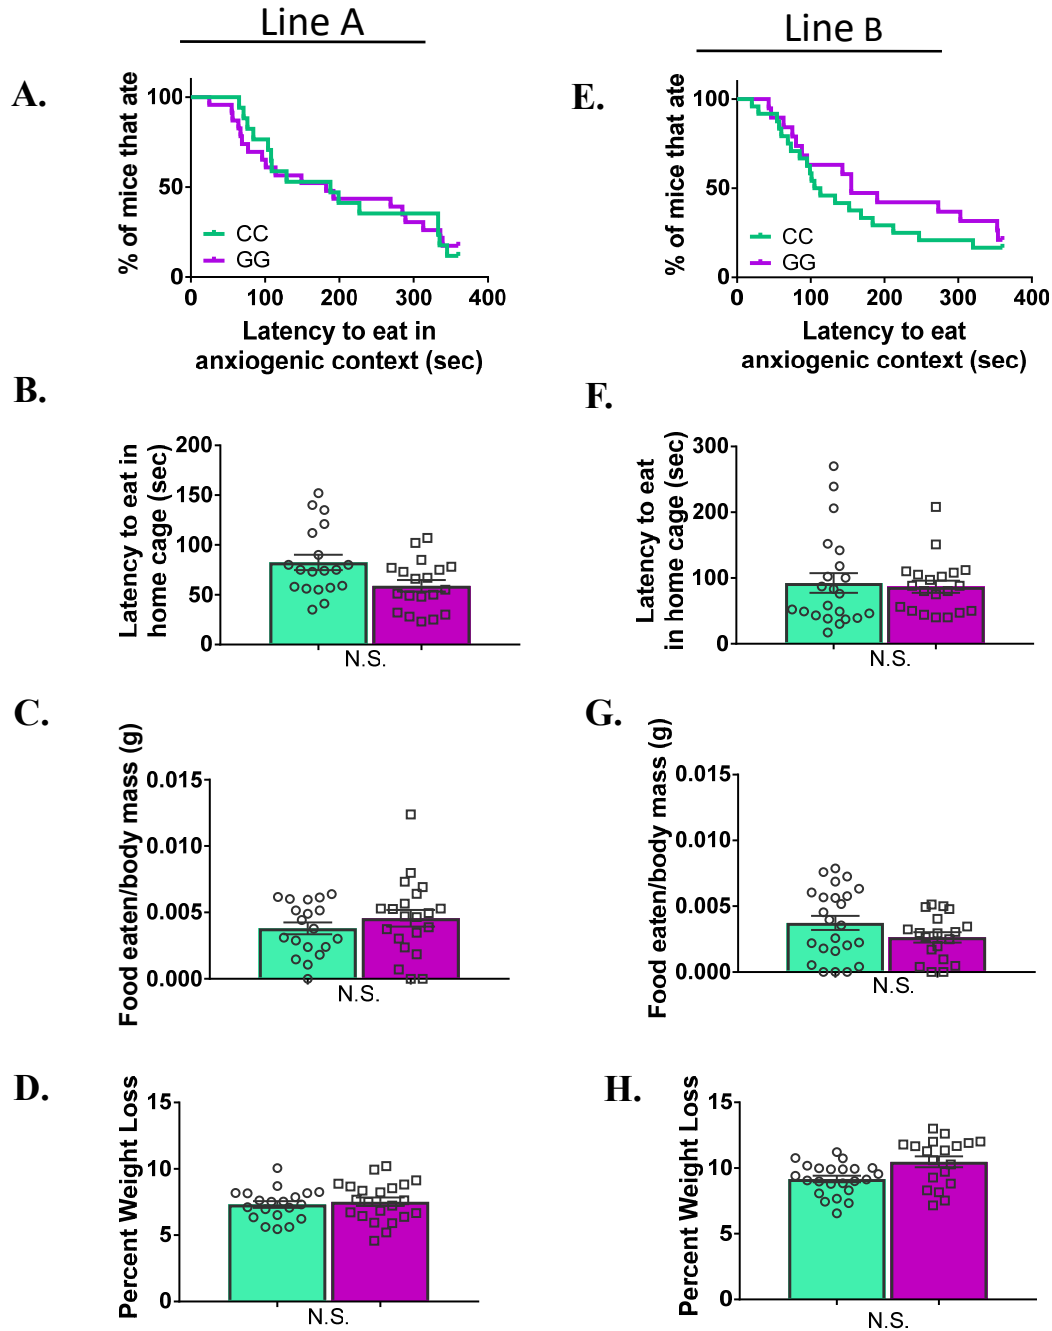

**Supplemental Figure 6. No differences between genotypes in novelty suppressed feeding.** In line A, there was no difference between genotypes in (A) latency to eat in the anxiogenic context, (B) latency to eat in the home cage, (C) grams of food eaten by body mass or (D) the percent weight loss. In line B, there was no difference in (E) latency to eat in the anxiogenic context, (F) latency to eat in the home cage, (G) the percent food eaten by body mass or (H) weight change. Values represent mean  $\pm$ SEM.

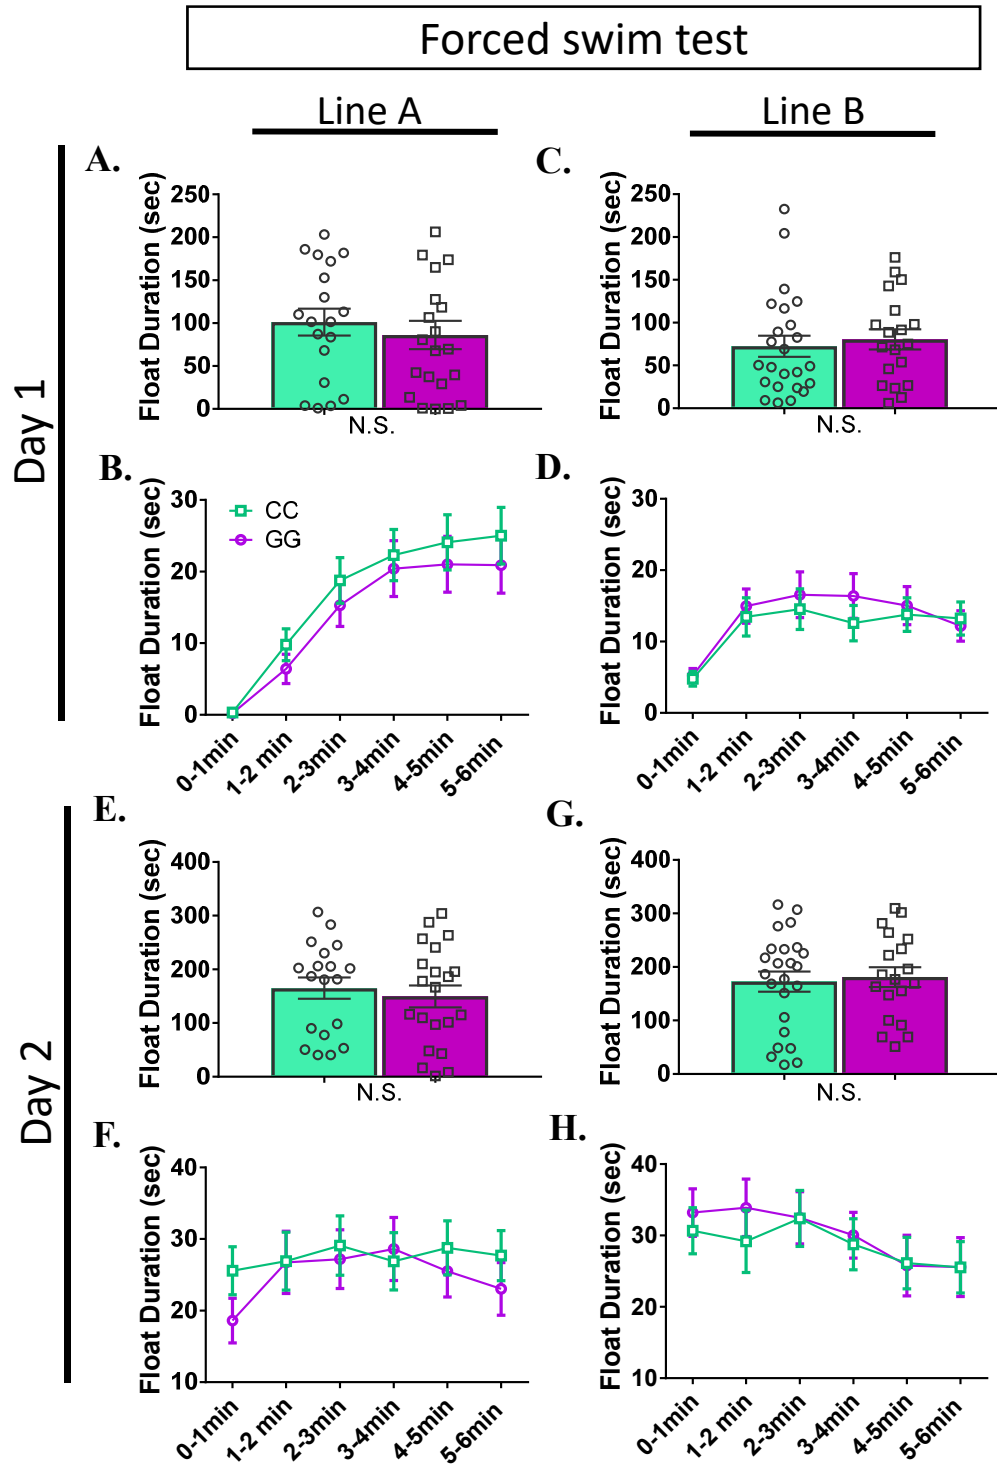

Tail suspension test

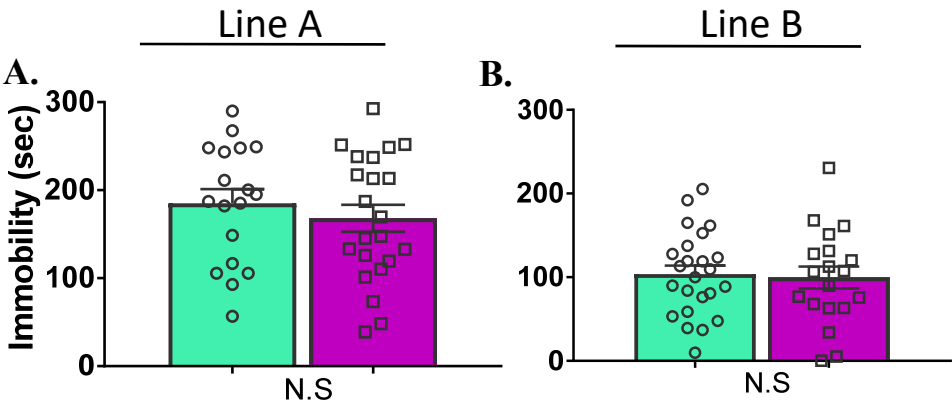

Supplemental Figure 8. No genotype differences in immobility in tail suspension test. Values represent mean  $\pm$ SEM.



**Table 1. Transgene transmission from founders**

| Line   | Founder Sex | BAC+ offspring | Total offspring | Percent transmission |
|--------|-------------|----------------|-----------------|----------------------|
| Line A | M           | 9              | 45              | 20%                  |
| Line B | F           | 22             | 37              | 59.40%               |
| Line C | M           | 7              | 47              | 14.90%               |

**Table 2. Oligos for checking BAC integrity**

| Amplicon | Forward_primer       | Reverse_primer       | Forward_tm | Reverse_tm | Product_size | Location |
|----------|----------------------|----------------------|------------|------------|--------------|----------|
| 1        | TGATCGGGCAATCATTTCTG | AAACCATCCAGCGATGTCAA | 61.926     | 61.449     | 104          | 2795     |
| 2        | TGCCTTTGAAGTTGGCTCAG | AAATGAGGCAGAGCGGAAAC | 61.481     | 61.646     | 150          | 15019    |
| 3        | CTCCAATGCTGTCTGGCAAC | GCATATTCACCACCAGACG  | 61.81      | 61.329     | 107          | 25108    |
| 4        | GGGGATAAGTTCAGGGGTGA | GGCCGCTATAACCAATAGC  | 61.076     | 60.788     | 115          | 33993    |
| 5        | TGAGAAGCCCCATTTCTCC  | GGTTCTGGCTTGGGATCACT | 61.46      | 61.429     | 138          | 47325    |
| 6        | TGTGTTATTGGGAGGCAGGA | ACGCCTCAGCAATGTCTCTG | 61.436     | 61.566     | 150          | 57091    |
| 7        | TCAAGATGCCTGAGCTTTCG | TTGGGGGATGCGATTAACT  | 61.593     | 61.542     | 107          | 61965    |
| 8        | CAGAGAGGCCAGTGTGTGCT | TCGTATCCTGGGGCTTCAAT | 61.649     | 61.724     | 109          | 79283    |
| 9        | ATTGAACTGCAAGGCAGCAG | AGGCCTCGCAGAGCTGTAGT | 61.513     | 61.645     | 121          | 84637    |
| 10       | CCTGTGGTCCCAGCTACTT  | TCACCAGGCTAGAGTGCGAG | 61.461     | 61.552     | 108          | 94964    |
| 11       | CTCCTCGGAGATACCCTTCG | AGAAAAAGCAGCGCGAAGAT | 61.103     | 61.502     | 138          | 103443   |
| 12       | GGTAACCTGCGACCTGTTCA | GGCGTCTCTTGTTCACGTA  | 61.096     | 61.236     | 132          | 110058   |
| 13       | TGGCATCTCGTGAACCTCA  | TTCTTTCCACAGGGTAGGC  | 61.431     | 61.37      | 123          | 125123   |
| 14       | TGCCAGTTGCAGTTTTTGGT | CAGCTGGTCTGACCCCTAT  | 61.636     | 61.436     | 104          | 130630   |
| 15       | ACATGGTGGCCACAAGAGAA | TGAATCATGGTGGCCAGTCT | 61.527     | 61.501     | 125          | 146638   |
| 16       | GAGGATATGCCCTCCATA   | TTATTCTGCCACCCTCACCA | 61.006     | 61.436     | 123          | 150687   |
| 17       | TTGGATGCCTACAAGCAA   | CCATCAGGCGGATTACTG   | 61.379     | 61.455     | 148          | 160459   |
| 18       | CCATTGTGGGCAGAGAACAC | GAGGTTGCAGTGAGCCAAGA | 61.527     | 61.546     | 133          | 171189   |

**Table 3. qPCR probes and efficiencies**

| Target Gene | Primer Sequences                                 | Probe                                                  |
|-------------|--------------------------------------------------|--------------------------------------------------------|
| mGAPDH      | Thermofisher taqman Mm99999915_g1, cat # 4331182 |                                                        |
| mDeaf1      | 5'-CAACATCAGTGGCAAACGC-3'                        | 5'-56FAM/TGTTCAAGGC/ZEN/<br>TGTCACCGATCTGC/3IABkFQ/-3' |
|             | 5'-CTCCACAATGCTCCCATCTG-3'                       |                                                        |
| hHTR1A      | 5'-TGTCGCTTCTCACAACTCTC-3'                       | 5'-56FAM/CCCTCCCCA/ZEN/<br>CTTCCTGCTCC/3IABkFQ/-3'     |
|             | 5'-CTTCTCCTTTTCTCTCTGCTC-3'                      |                                                        |
| Target Gene | R <sup>2</sup>                                   | Efficiency %                                           |
| mGAPDH      | 0.996                                            | 90.034                                                 |
| mDeaf1      | 0.993                                            | 93.533                                                 |
| hHTR1A      | 0.989                                            | 93.616                                                 |
